## **Transit and integration of extracellular mitochondria in human heart cells**

Douglas B. Cowan<sup>1,2,3</sup>, Rouan Yao<sup>1</sup>, Jerusha K. Thedsanamoorthy<sup>1</sup>, David Zurakowski<sup>1,2,4</sup>, Pedro J. del Nido<sup>4,5</sup> & James D. McCully<sup>4,5</sup>

<sup>1</sup>Department of Anesthesiology, Perioperative and Pain Medicine, Boston Children's Hospital, Boston, Massachusetts 02115, USA.

<sup>2</sup>Department of Anæsthesia, Harvard Medical School, Boston, Massachusetts 02115, USA.

<sup>3</sup>Harvard Stem Cell Institute, Cambridge, Massachusetts 02138, USA.

<sup>4</sup>Department of Cardiac Surgery, Boston Children's Hospital, Boston, Massachusetts 02115, USA.

<sup>5</sup>Department of Surgery, Harvard Medical School, Boston, Massachusetts 02115, USA.

### Corresponding author

Douglas B. Cowan, Boston Children's Hospital, 300 Longwood Avenue, Enders 312.1, Boston, MA 02115-5724 USA. Telephone – (617) 919-2655, E-mail – [douglas.cowan@childrens.harvard.edu](mailto:douglas.cowan@childrens.harvard.edu)

### Manuscript information

Title Length – 10 words

Abstract – 250 words

Main Text – 2,042 words

References – 42

Display Items – 4

Extended Data Display Items – 5

Methods – 1,178 words

1 Tissue ischemia adversely affects the function of mitochondria, which results in impairment of oxidative  
2 phosphorylation and compromised recovery of the affected organ. The impact of ischemia on  
3 mitochondrial function has been most extensively studied in the heart because of the morbidity and  
4 mortality associated with injury to this organ. Because conventional methods to preserve cell viability  
5 and function following an ischemic injury are limited in their efficacy, we developed a unique approach  
6 to protect the heart by transplanting respiration-competent mitochondria isolated from a non-ischemic  
7 tissue to the ischemic region. Our experiments in animals have shown that transplantation of isolated  
8 mitochondria to injured heart tissue leads to decreases in cell death, increases in energy production,  
9 and improvements in contractile function. We also discovered that exogenously-derived mitochondria  
10 injected or perfused into ischemic hearts were readily internalized by cardiac cells through actin-  
11 dependent endocytosis. Here, we describe the use of three-dimensional super-resolution microscopy  
12 and transmission electron microscopy to determine the intracellular fate of exogenous mitochondria in  
13 non-dividing human iPS-derived cardiomyocytes and dividing primary human cardiac fibroblasts. We  
14 show isolated mitochondria are internalised in human cardiac cells within minutes and then transported  
15 to endosomes and lysosomes. The majority of exogenous mitochondria escape from these  
16 compartments and fuse with the endogenous mitochondrial network, while some organelles are  
17 degraded through hydrolysis. Understanding this process may guide the development of treatments  
18 directed at replacing or augmenting impaired mitochondria in ischemic tissues and provide new options  
19 to rejuvenate dysfunctional mitochondria in a wide range of human diseases and disorders.

## 20 Introduction

21 Mitochondria play an essential role in energy production and cellular homeostasis. Dysfunction  
22 of these organelles as a result of ischemia or genetic mutations can lead to the loss of high-energy  
23 phosphate reserves, accumulation of mitochondrial calcium, and a buildup of reactive oxygen  
24 molecules<sup>1-5</sup>. Our previous studies demonstrated that transplanting isolated mitochondria to the  
25 ischemic heart leads to reductions in infarct size, increases in adenosine triphosphate (ATP)  
26 production, and improvements in contractility<sup>6,7</sup>. We also observed that mitochondria injected or  
27 perfused into the heart were rapidly internalised by a variety of cardiac cells including cardiomyocytes  
28 and fibroblasts<sup>7,8</sup>. Additional experiments using cell cultures proved that the uptake of mitochondria  
29 occurs through actin-dependent endocytosis and results in rescue of cellular function by increasing  
30 energy production and replenishing mitochondrial DNA (mtDNA)<sup>9</sup>. While other researchers have also  
31 observed endocytic uptake of extracellular mitochondria, the exact intracellular trafficking and fate of  
32 these organelles remains unknown<sup>10-15</sup>.

33 In this study, we used three-dimensional super-resolution structured illumination microscopy (3-  
34 D SR-SIM) and transmission electron microscopy (TEM) to reveal the intracellular fate of exogenous  
35 mitochondria in human induced pluripotent stem cell-derived cardiomyocytes (iPS-CMs) and human  
36 cardiac fibroblasts (HCFs). By labelling extracellular mitochondria with fluorescent proteins or gold  
37 nanoparticles, we were able to observe the transit of endocytosed mitochondria in these cells. Distinct  
38 fluorescent labelling of various cell compartments in iPS-CMs and HCFs allowed us to visualise the  
39 progression of exogenous mitochondria through the endolysosomal system and established that these  
40 organelles primarily integrate with the endogenous mitochondrial network in both cell types. When  
41 combined with the findings of other investigators, our results strongly support the notion that the uptake  
42 and subsequent fusion of extracellular mitochondria with recipient cell mitochondria is an evolutionarily-  
43 conserved and pervasive biological process<sup>7-16</sup>. A thorough understanding of the intracellular fate of  
44 exogenous mitochondria may present new treatment strategies for the ischemic heart and drive the  
45 development of organelle-based therapeutics for a host of other human diseases and disorders<sup>17-20</sup>.

## 46 **Results**

### 47 ***Labelling of organelles and characterization of isolated mitochondria***

48 We investigated the temporal and spatial fate of endocytosed mitochondria in non-dividing iPS-  
49 CMs and dividing HCFs. The identity and morphology of these cardiac cells was substantiated by  
50 immunostaining with  $\alpha$ -actinin (ACTN) and vimentin and both cell types were shown to react well with  
51 established mitochondrial antibodies (TOMM20 or MTC02) (Extended Data Fig. 1a). To discern  
52 exogenous mitochondria within cultured cells, we labelled HCF mitochondria with green fluorescent  
53 protein (GFP) and used red fluorescent proteins (RFP) to label various HCF and iPS-CM cell  
54 compartments through baculovirus-mediated transfer of mammalian fusion genes (Fig. 1a). Both cell  
55 types were readily infected with baculoviruses carrying fluorescent protein genes and demonstrated  
56 specific expression of GFP or RFP in organelles including mitochondria, early and late endosomes,  
57 lysosomes, Golgi complexes, and the endoplasmic reticulum (Extended Data Fig. 1b). Isolated HCF  
58 GFP-labelled mitochondria were also stained with MitoTracker Red CMXRos or a human mitochondria-  
59 specific antibody (MTC02) to confirm their identity and then imaged using 3-D SR-SIM (Fig. 1b).  
60 Isolated mitochondria were generally spherical in shape and varied in diameter from 250 to 2000  $\mu\text{m}$   
61 with the majority of these organelles falling within the 350 to 600  $\mu\text{m}$  range<sup>7</sup>. In addition, adenosine  
62 triphosphate (ATP) measurements verified that isolated mitochondria were viable and energised (Fig.  
63 1c), whereas transmission electron microscopy revealed these organelles were structurally intact (Fig.  
64 1d)<sup>7,8,21</sup>.

### 65 ***Endocytosis and intracellular position of exogenous mitochondria***

66 To examine endocytosis of isolated mitochondria in iPS-CMs, we first labeled HCF mitochondria  
67 with 10 nm diameter gold nanoparticles (Fig. 2a) to allow for their identification by transmission electron  
68 microscopy. Labelled exogenous mitochondria were observed outside cells, near cell surfaces, in the  
69 process of endocytic engulfment, and inside iPS-CMs<sup>22</sup>. Next, the intracellular position of endocytosed  
70 mitochondria in iPS-CMs was determined using four color 3-D SR-SIM (Fig. 2 and Extended Data Fig.  
71 2). Because we did not observe GFP-labelled mitochondria associated with either the Golgi complex or

72 endoplasmic reticulum, we focused on examining whether RFP-labelled endosomes, lysosomes, or  
73 endogenous mitochondria colocalised with internalised HCF mitochondria. Early endosomes (Fig. 2b),  
74 late endosomes (Fig. 2c), and lysosomes (Fig. 2d) of cardiomyocytes were all found to contain GFP-  
75 labelled mitochondria at each time examined (0.5, 1, 2, and 4h). Endocytosed mitochondria were also  
76 found in close proximity to the endogenous mitochondrial network, which was generally located apical  
77 to the contractile apparatus (Extended Data Fig. 2a).

### 78 ***Escape of exogenous mitochondria from the endolysosomal system***

79 Exogenous mitochondria associated with early endosomes, late endosomes, and lysosomes  
80 were observed to be fully encapsulated or partly contained within these compartments. Mitochondria  
81 partially enclosed in endocytic vesicles were considered to be escaping from their respective  
82 endosomal or lysosomal compartments. Cell preparations were also stained with anti-human  
83 mitochondria antibody (MTC02) to confirm that green fluorescence was attributable to the presence of  
84 intact organelles; though, this antibody was less reactive with encapsulated mitochondria — likely a  
85 consequence of reduced antigen accessibility. To further corroborate the identity of the above  
86 compartments, we stained cardiomyocyte cell preparations with early endosome antigen 1 (EEA1) and  
87 the late endocytic marker Rab7 (Extended Data Fig. 2b-d). In addition, we observed some lysosomes  
88 associated with exogenous mitochondria also stained for Rab7, which could simply epitomize the  
89 normal heterogeneity of the lysosomal compartment or indicate these particular compartments may be  
90 more accurately described as endolysosomal vesicles<sup>23,24</sup>.

91 The escape of exogenous mitochondria from endosomes and lysosomes was assessed by  
92 counting colocalisation of GFP-labelled mitochondria with each of these compartments. High-  
93 magnification 3-D SR-SIM indicated GFP-labelled mitochondria became increasingly reactive with  
94 MTC02 antibody upon emerging from late endosomes (Fig. 3a) as well as early endosomes and  
95 lysosomes (not shown). Enumeration of colocalisation of endocytosed mitochondria with endosomes  
96 and lysosomes at each time established that a majority of these exogenous organelles were associated  
97 with these vesicles at the earlier times (0.5 to 2 h); however, there was no obvious pattern to

98 endolysosomal trafficking other than a decline in colocalisation at 4 h (Fig. 3b). The number of  
99 mitochondria escaping from these compartments showed the opposite trend with the largest number of  
100 organelles emerging from late endosomes and lysosomes at 4 h (Fig. 3c). We extended these analyses  
101 to include colocalisation between endogenous and exogenous mitochondria (Fig. 3d). These  
102 experiments demonstrated a large percentage of GFP-labelled mitochondria were closely associated  
103 with the cardiomyocyte mitochondrial network from 0.5 to 4 h. The functional consequence of the  
104 uptake and trafficking of extracellular mitochondria in cardiomyocytes is a sustained and significant  
105 increase in ATP production, similar to our earlier findings<sup>9</sup>. Together, these results indicate that  
106 endocytosis and intracellular trafficking of extracellular mitochondria in cardiomyocytes is an ongoing  
107 and efficient biological process.

#### 108 ***Fusion of exogenous mitochondria with the endogenous mitochondrial network***

109 The fusion of endocytosed mitochondria with the endogenous mitochondria of cardiomyocytes  
110 (Fig. 4a) and cardiac fibroblasts (Extended Data Fig. 3a-c) was assessed by 3-D SR-SIM. In  
111 combination with depth coding analyses (Extended Data Fig. 4a), these experiments established that  
112 exogenous mitochondria fuse with the endogenous mitochondrial network after escape from  
113 endolysosomal compartments and that mitochondrial fusion was evident at all of the studied times (0.5,  
114 1, 2, and 4 h). The involvement of fusion proteins in facilitating this process was determined by studying  
115 expression of mitofusin-1 (MFN1), mitofusin-2 (MFN2), and optic atrophy 1 (OPA1) proteins in iPS-CMs  
116 and HCFs by immunoblot analysis (Fig. 4b). We then examined the spatial distribution of mitofusin  
117 proteins using 3-D SR-SIM (Fig. 4c and Extended Data Fig 4b). Mitofusin proteins are involved in  
118 tethering and fusing the mitochondrial outer membranes and OPA1 functions, in part, to enable inner  
119 mitochondrial membrane fusion<sup>25-27</sup>. The anti-mitochondria antibodies 113-1 (shown) or MTC02 were  
120 used to reflect the total mitochondrial content in iPS-CMs and HCFs<sup>8</sup>.

121 Both cell types had equivalent amounts of MFN1 protein; however, only cardiomyocytes  
122 contained detectable quantities of MFN2. These findings suggest exogenous HCF mitochondria only  
123 have MFN1 on their outer membrane, which interacts with either MFN1 or MFN2 on endogenous

124 cardiomyocyte mitochondria. Conversely, MFN2 did not appear to be necessary for fusion as  
125 exogenous HCF mitochondria efficiently fused with HCF endogenous mitochondria (Extended Data Fig.  
126 3). Analysis of OPA1 expression revealed cardiomyocytes possess relatively small amounts of the long  
127 form of this protein as well as two short forms, while HCFs produced a larger quantity of only the long  
128 form. The long form of OPA1 is a membrane-anchored protein involved in fusion of the mitochondrial  
129 inner membrane, whereas the short forms are soluble proteins associated with mitochondrial fission  
130 and other cellular functions<sup>28</sup>. 3-D SR-SIM of MFN1 and MFN2 demonstrated that both of these  
131 proteins localised to fusing exogenous and endogenous mitochondria. At the same time, these  
132 mitofusin proteins were widely distributed throughout cardiomyocytes, which is consistent with their  
133 other known roles in the cell<sup>26,27</sup>. The presence of these proteins in cardiomyocyte nuclei may be  
134 indicative of a yet to be discovered function. Our results established that extracellular mitochondria are  
135 endocytosed in cardiac cells and most of these exogenous organelles end up fusing with the  
136 endogenous mitochondrial network (Extended Data Fig. 5). On the other hand, some exogenous  
137 mitochondria did not appear to escape from the endolysosomal compartments and are assumed to  
138 undergo hydrolysis and degradation through autophagy. This assumption is supported by the  
139 appearance of fragmented mitochondria in some lysosomes (Extended Data Fig. 2d).

## 140 **Discussion**

141 The ability to distinguish the precise intracellular location of internalised exogenous human  
142 mitochondria using 3-D super-resolution and transmission electron microscopy in cardiac cells has  
143 allowed us to understand the intracellular trafficking of these organelles through time. Electron  
144 microscopy demonstrated that extracellular mitochondria begin to be endocytosed by human iPS-  
145 derived cardiomyocytes and primary cardiac fibroblasts within minutes. These organelles subsequently  
146 progress through the endolysosomal system from early endosomes to late endosomes to lysosomes.  
147 While some exogenous mitochondria appear to be destined for degradation in the latter compartment,

148 our results show that the majority of exogenous mitochondria escape from endosomal and lysosomal  
149 compartments and then effectively fuse with endogenous cardiac cell mitochondria.

150 Our earlier experiments, and those of others, established that endocytosis of extracellular  
151 mitochondria was dependent on actin polymerization and that internalisation of these organelles  
152 resulted in long-term replenishment of mtDNA in HeLa cell-derived  $\rho^0$  cells, which are otherwise devoid  
153 of mtDNA<sup>9,11,14,29-31</sup>. Restoration of the  $\rho^0$  mitochondrial genome through uptake of mitochondria isolated  
154 from HeLa cells led to enhancement of intracellular ATP levels and oxygen consumption rates<sup>9</sup>.  
155 Because increases in  $\rho^0$  cellular respiration persisted for more than 50 population doublings, it was  
156 evident that endocytosed HeLa cell mitochondria containing functional mtDNA were lastingly integrated  
157 within these cells. However, we did not resolve how internalized HeLa cell mitochondria were  
158 transported within  $\rho^0$  cells and whether they fused with endogenous mitochondria, persisted as distinct  
159 organelles, or merely contributed their DNA to  $\rho^0$  mitochondria.

160 In this study, we defined the intracellular transit of extracellular mitochondria from the plasma  
161 membrane through to their incorporation with the endogenous mitochondrial network in two types of  
162 human heart cells — one dividing (HCFs) and one non-dividing (iPS-CMs). Our findings support the  
163 view that endocytosis and integration of exogenous mitochondria is an ancient biological process that is  
164 distinct from the recently described cell-to-cell transfer of mitochondria through tunneling nanotubes or  
165 exosomes<sup>16,30,32,33</sup>. In essence, our observations of the uptake of isolated mitochondria in human heart  
166 cells corroborates the endosymbiotic theory advanced and substantiated by Lynn Margulis (formerly  
167 Sagan) half a century ago<sup>34</sup>.

168 A complete understanding of the mechanisms that bring about endocytosis of extracellular  
169 mitochondria and fusion of those organelles with the endogenous mitochondrial network may provide a  
170 foundation for innovative new treatments to a number of human diseases and disorders<sup>35</sup>. Our earlier  
171 work has supported the use of mitochondrial transplantation to decrease infarction, increase ATP  
172 content, and improve functional performance of the ischemic heart<sup>6-9,17</sup>. We also demonstrated that  
173 delivery of exogenous mitochondria to the heart in animal models does not provoke an immune



174 response nor produce arrhythmias<sup>7,21</sup>. Importantly, the clinical relevance and safety of autologous  
175 mitochondrial transplantation to the ischemic heart has recently been validated in five pediatric  
176 patients<sup>36</sup>. Aside from providing benefits to ischemic tissues, transplantation of exogenous mitochondria  
177 may also prove to be useful for treating mitochondrial myopathies and a number of other diseases with  
178 underlying mitochondrial dysfunction<sup>13,15-18,20,37-40</sup>. Further study of the molecular mechanisms of  
179 exogenous mitochondrial endocytosis and fusion with endogenous mitochondria are warranted and  
180 these inquiries may guide development of innovative treatments directed at augmenting impaired  
181 mitochondria in a wide range of tissues and cells.

182 **METHODS**

183 **Reagents.** The following antibodies were purchase from Abcam: anti- $\alpha$ -actinin (ab68167), anti-vimentin  
184 (ab92547), anti-TOMM20 (ab56783), anti-Mitochondria antibody [MTC02] (ab3298), anti-Mitochondria  
185 antibody [113-1] (ab92824), anti-Mitofusin 1 antibody (ab57602), anti-Mitofusin 2 antibody (ab101055),  
186 anti-OPA1 antibody (ab157457), anti-Rab5 antibody (ab18211), anti-Rab7 antibody (ab50533), and  
187 anti-Rab9 antibody (ab2810). The mouse IgG isotype control (10400C) and rabbit IgG isotype control  
188 (10500C) antibodies were purchased from ThermoFisher Scientific. The following CellLight reagents  
189 were purchased from ThermoFisher Scientific: Early endosomes (C10586 and C10587), Endoplasmic  
190 Reticulum (C10590 and C10591), Golgi Complex (C10592 and C10593), Late endosomes (C10588  
191 and C10589), Lysosomes (C10596 and C10597), Mitochondria (C10600 and C10601) and Null Virus  
192 Negative Control (C10615). MitoTracker Red CMXRos (M7512) was purchased from ThermoFisher  
193 Scientific and used according to the manufacturer's directions at 100 nM.

194 **Cells.** iCell-Cardiomyocytes<sup>2</sup> (iPS-CMs) (CMC-100-012-001) were purchased from Cellular Dynamics  
195 and Human Cardiac Fibroblasts (HCFs) (6300) were purchased from Sciencell Research Laboratories.  
196 Cells were cultured according to the manufacturer's directions. Baculovirus infections were performed  
197 on dividing HCFs by adding 400  $\mu$ L of CellLight reagent to a 100-mm confluent plate of cells for 16 h.  
198 Spontaneously contracting syncytial monolayers of iPS-CMs ( $\geq$  96 hours after plating) were infected for  
199 16 h by using 10% CellLight reagent in iCell Cardiomyocyte Maintenance Medium (CMM-100-120-001)  
200 (Cellular Dynamics) containing 0.2  $\mu$ M BacMam Enhancer kit (ThermoFisher Scientific).

201 **Mitochondria.** HCF media was replaced with 4 mL of 4°C homogenisation buffer (300 mM sucrose, 10  
202 mM HEPES-KOH, 1 mM EGTA-KOH, pH 7.4) containing 2 mg Subtilisin A protease from *Bacillus*  
203 *licheniformis* (Sigma-Aldrich) and incubated at room temperature for 5 min. Digested cells were  
204 transferred to a 15-mL tube on ice and digested for an additional 15 min before filtration through a 10  
205  $\mu$ m mesh filter (PluriSelect) saturated with cold homogenisation buffer. Mitochondria were collected by  
206 centrifugation at 9,500 RCF at 4°C for 5 minutes and washed 3 times in cold homogenisation buffer  
207 before resuspension in culture media. Mitochondrial number was determined by using a Multisizer 4e

208 Coulter Counter (Beckman-Coulter) and corroborated by hemocytometry. Isolated mitochondria were  
209 incubated with HCFs or iPS-CMs for 0 to 4 h.

210 **Labelling.** Some isolated mitochondria ( $1 \times 10^8$ ) were conjugated to 10 nm NHS-activated gold  
211 nanoparticles (CytoDiagnostics) according to the manufacturer's directions. Labeled mitochondria were  
212 washed 5 times with homogenisation buffer containing 1 mg/mL fraction V bovine serum albumin (BSA)  
213 to remove unreacted nanoparticles. Gold-labeled mitochondria were incubated with iPS-CMs for 0, 2.5,  
214 5 and 10 minutes prior to fixation and preparation for transmission electron microscopy.

215 **Immunoblots.** Proteins were isolated by rinsing cells with ice-cold PBS (pH 7.4) and lifting them from  
216 the plates with a rubber policeman. Pelleted cells were resuspended in a small volume of ice-cold lysis  
217 solution (150 mM NaCl, 20 mM Tris-HCl (pH 7.6), 1 mM EDTA, 0.5% sodium deoxycholate, 70 mM  
218 NaF, 1% Nonidet P-40, Complete protease inhibitor cocktail (Sigma-Aldrich), 200  $\mu$ M sodium  
219 orthovanadate, and 2  $\mu$ M phenylmethylsulfonyl fluoride)<sup>41</sup>. After a 10-min incubation on ice with  
220 intermittent, brief agitation, debris was pelleted in a microcentrifuge, and the supernatants were stored  
221 at  $-80^\circ\text{C}$ . Protein concentrations were determined using the bicinchoninic acid (BCA) protein  
222 determination kit (Pierce). SDS-PAGE and transfer to nitrocellulose was performed using the XCell  
223 SureLock Mini-Cell System and XCell II Blot Module (ThermoFisher), respectively. Identical gels were  
224 stained with Coomassie brilliant blue R250 to confirm equal protein loading. The ColorBurst  
225 Electrophoresis Marker (Sigma-Aldrich) and MagicMark XP Western Protein Standard (ThermoFisher)  
226 were used according to the manufacturer's directions. Nitrocellulose membranes were rinsed in Tris-  
227 buffered saline (pH 7.4) containing 0.1% Tween 20 (TBS-T) and blocked in 5% non-fat milk in TBS-T  
228 for 1 h at  $22^\circ\text{C}$  on a rocking platform. Membranes were incubated overnight at  $4^\circ\text{C}$  on an orbital shaker  
229 with primary antibodies diluted 1:1000 in TBS-T containing 1% non-fat milk (Sigma). Antibodies were  
230 detected with the Amersham ECL Western Blotting Analysis System (GE Healthcare).

231 **Staining.** Cells cultured on № 1.5H ( $170 \mu\text{m} \pm 5 \mu\text{m}$ ) coverslips (Marienfeld-Superior) were fixed in 4%  
232 freshly-prepared formaldehyde in phosphate buffered saline (PBS). Cells were permeabilised in 0.1%  
233 Triton X-100 in PBS for 3 minutes and incubated with primary antibodies diluted 1:1000 in 10% fetal

234 bovine serum (FBS) in PBS for 1 h. Primary antibodies were detected with species-appropriate Alexa  
235 Fluor 488-, 568-, or 633-conjugated secondary antibodies (ThermoFisher) diluted in PBS and cells  
236 were simultaneously stained using 4',6-diamidino-2-phenylindole (DAPI) (ThermoFisher). Coverslips  
237 were mounted to slides using ProLong Diamond Mountant (ThermoFisher).

238 **Microscopy.** Cells were visualised on a ELYRA PS.1 (Zeiss) attached to a LSM 710 inverted  
239 microscope (Zeiss) with a 100x oil objective (Zeiss) and a DAPI/GFP/mRFP/Alexa 633 fluorescence  
240 filter set. Optical sections (84 nm) were collected through entire cell volumes using 5 grid patterns for  
241 structured illumination microscopy. Image stacks were processed using ZEN Black software (Zeiss)  
242 and displayed as transparent three-dimensional (3-D) volumetric renderings. Widefield fluorescence  
243 microscopy was performed using a FSX100 (Olympus). For transmission electron microscopy, iPS-  
244 CMs cultured on Thermanox coverslips (ThermoFisher) were fixed in 2% formaldehyde, 2.5% grade I  
245 glutaraldehyde, and 0.03% picric acid in 0.1 M cacodylate buffer, pH 7.4 at 4°C prior to incubation in  
246 1% osmium tetroxide and 1.5% potassium ferrocyanide dissolved in cacodylate buffer. After contrast  
247 staining with 1% uranyl acetate in cacodylate buffer, cells were dehydrated and infiltrated with a 1:1  
248 mixture of Epon-Araldite (Electron Microscopy Sciences) and propylene oxide. Embedding resins were  
249 polymerised for 24 to 48 h at 60°C and 60 nm-thick sections on were placed on copper grids and  
250 imaged on a Jeol 1200EX (80 kV).

251 **Biochemistry.** ATP content was determined in the presence or absence of 1  $\mu$ M adenosine  
252 diphosphate (ADP) using the ATPlite luminescence assay (PerkinElmer).

253 **Statistics.** Control and experimental ATP data was expressed as concentration  $\pm$  standard error of the  
254 mean (SEM). Statistical analysis was performed by Student's t-test and a  $p < 0.05$  was considered  
255 significant. The number of internalised GFP-labeled mitochondria associated with RFP-labeled early  
256 endosomes, late endosomes, lysosomes, or mitochondria was enumerated at 0.5, 1, 2, and 4 h by  
257 fluorescence microscopy. Twenty-five randomly-selected, high-powered (400x) fields were acquired at  
258 each time point and in each of the 4 cell compartments. From 1,852 to 12,007 mitochondria were  
259 counted per compartment at any given time. For early endosomes, late endosomes and lysosomes,

260 GFP-labeled mitochondria were quantified as fully encapsulated, partially encapsulated (escaping) or  
261 not associated with each compartment. GFP-mitochondria were determined to be either fusing with the  
262 RFP-labeled endogenous mitochondria or not associated with these organelles. Analysis of the cell  
263 count data was performed using a generalised linear modeling approach with the gamma distribution  
264 and a log link function to evaluate the escaping mitochondria as a percentage of total cells between the  
265 4 time points (0.5, 1, 2, and 4 h) within each compartment (early endosome, late endosome, and  
266 lysosome)<sup>42</sup>. Fit of the model was assessed by the Akaike information criterion. Summary data are  
267 expressed in terms of the mean percentage with the standard error and two-tailed Bonferroni adjusted.  
268  $p < 0.05$  are considered statistically significant based on the Wald test. Statistical analysis was  
269 conducted using SPSS Statistics version 23.0 (IBM).

270 **Data Availability.** The datasets generated during and/or analysed during the current study are  
271 available from the corresponding author on reasonable request.

272 **References**

- 273 1 Ozcan, C., Holmuhamedov, E. L., Jahangir, A. & Terzic, A. Diazoxide protects mitochondria from  
274 anoxic injury: Implications for myopreservation. *J. Thorac. Cardiovasc. Surg.* **121**, 298-306 (2001).
- 275 2 McCully, J. D. *et al.* Diazoxide amelioration of myocardial injury and mitochondrial damage during  
276 cardiac surgery. *Ann. Thorac. Surg.* **74**, 2138-2145 (2002).
- 277 3 Lesnefsky, E. J. *et al.* Ischemia, rather than reperfusion, inhibits respiration through cytochrome  
278 oxidase in the isolated, perfused rabbit heart: Role of cardiolipin. *Am. J. Physiol. Heart Circ.*  
279 *Physiol.* **287**, H258-H267 (2004).
- 280 4 Rousou, A. J., Ericsson, M., Federman, M., Levitsky, S. & McCully, J. D. Opening of mitochondrial  
281 KATP channels enhances cardioprotection through the modulation of mitochondrial matrix volume,  
282 calcium accumulation, and respiration. *Am. J. Physiol. Heart Circ. Physiol.* **287**, H1967-1976  
283 (2004).
- 284 5 Kornfeld, O. S. *et al.* Mitochondrial reactive oxygen species at the heart of the matter: New  
285 therapeutic approaches for cardiovascular diseases. *Circ. Res.* **116**, 1783-1799 (2015).
- 286 6 McCully, J. D. *et al.* Injection of isolated mitochondria during early reperfusion for cardioprotection.  
287 *Am. J. Physiol. Heart Circ. Physiol.* **296**, H94-H105 (2009).
- 288 7 Masuzawa, A. *et al.* Transplantation of autologously derived mitochondria protects the heart from  
289 ischemia-reperfusion injury. *Am. J. Physiol. Heart Circ. Physiol.* **304**, H966-982 (2013).
- 290 8 Cowan, D. B. *et al.* Intracoronary delivery of mitochondria to the ischemic heart for cardioprotection.  
291 *PLoS ONE* **11**, e0160889 (2016).
- 292 9 Pacak, C. A. *et al.* Actin-dependent mitochondrial internalization in cardiomyocytes: Evidence for  
293 rescue of mitochondrial function. *Biol. Open* **4**, 622-626 (2015).
- 294 10 Clark, M. A. & Shay, J. W. Mitochondrial transformation of mammalian cells. *Nature* **295**, 605-607  
295 (1982).
- 296 11 Kitani, T., Kami, D., Matoba, S. & Gojo, S. Internalization of isolated functional mitochondria:  
297 Involvement of macropinocytosis. *J. Cell. Mol. Med.* **18**, 1694-1703 (2014).

- 298 12 Kitani, T. *et al.* Direct human mitochondrial transfer: A novel concept based on the endosymbiotic  
299 theory. *Transplant. Proc.* **46**, 1233-1236 (2014).
- 300 13 Caicedo, A. *et al.* MitoCeption as a new tool to assess the effects of mesenchymal stem/stromal cell  
301 mitochondria on cancer cell metabolism and function. *Sci. Rep.* **5**, 9073 (2015).
- 302 14 Kesner, E. E., Saada-Reich, A. & Lorberboum-Galski, H. Characteristics of mitochondrial  
303 transformation into human cells. *Sci. Rep.* **6**, 26057 (2016).
- 304 15 Hayakawa, K. *et al.* Transfer of mitochondria from astrocytes to neurons after stroke. *Nature* **535**,  
305 551-555 (2016).
- 306 16 Islam, M. N. *et al.* Mitochondrial transfer from bone-marrow-derived stromal cells to pulmonary  
307 alveoli protects against acute lung injury. *Nat. Med.* **18**, 759-765 (2012).
- 308 17 McCully, J. D., Levitsky, S., del Nido, P. J. & Cowan, D. B. Mitochondrial transplantation for  
309 therapeutic use. *Clin. Transl. Med.* **5**, 16 (2016).
- 310 18 Exner, N., Lutz, A. K., Haass, C. & Winklhofer, K. F. Mitochondrial dysfunction in Parkinson's  
311 disease: Molecular mechanisms and pathophysiological consequences. *EMBO J.* **31**, 3038-3062  
312 (2012).
- 313 19 Agrawal, A. & Mabalirajan, U. Rejuvenating cellular respiration for optimizing respiratory function:  
314 Targeting mitochondria. *Am. J. Physiol. Lung Cell. Mol. Physiol.* **310**, L103-113 (2016).
- 315 20 Liu, C. S. *et al.* Delivering healthy mitochondria for the therapy of mitochondrial diseases and  
316 beyond. *Int. J. Biochem. Cell. Biol.* **53**, 141-146 (2014).
- 317 21 Kaza, A. K. *et al.* Myocardial rescue with autologous mitochondrial transplantation in a porcine  
318 model of ischemia/reperfusion. *J. Thorac. Cardiovasc. Surg.* **153**, 934-943 (2017).
- 319 22 Kumari, S., Mg, S. & Mayor, S. Endocytosis unplugged: multiple ways to enter the cell. *Cell Res.*  
320 **20**, 256-275 (2010).
- 321 23 Bucci, C., Thomsen, P., Nicoziani, P., McCarthy, J. & van Deurs, B. Rab7: a key to lysosome  
322 biogenesis. *Mol. Biol. Cell* **11**, 467-480 (2000).

- 323 24 Humphries, W. H. t., Szymanski, C. J. & Payne, C. K. Endo-lysosomal vesicles positive for Rab7  
324 and LAMP1 are terminal vesicles for the transport of dextran. *PLoS ONE* **6**, e26626 (2011).
- 325 25 Franco, A. *et al.* Correcting mitochondrial fusion by manipulating mitofusins conformations. *Nature*  
326 **540**, 74-79 (2016).
- 327 26 Pernas, L. & Scorrano, L. Mito-Morphosis: Mitochondrial fusion, fission, and cristae remodeling as  
328 key mediators of cellular function. *Annu. Rev. Physiol.* **78**, 505-531 (2016).
- 329 27 Mishra, P. & Chan, D. C. Metabolic regulation of mitochondrial dynamics. *J. Cell Biol.* **212**, 379-387  
330 (2016).
- 331 28 MacVicar, T. & Langer, T. OPA1 processing in cell death and disease - the long and short of it. *J.*  
332 *Cell Sci.* **129**, 2297-2306 (2016).
- 333 29 Kukat, A. *et al.* Generation of rho0 cells utilizing a mitochondrially targeted restriction endonuclease  
334 and comparative analyses. *Nucleic Acids Res.* **36**, e44 (2008).
- 335 30 Lin, H. Y. *et al.* Mitochondrial transfer from Wharton's jelly-derived mesenchymal stem cells to  
336 mitochondria-defective cells recaptures impaired mitochondrial function. *Mitochondrion* **22**, 31-44  
337 (2015).
- 338 31 Wu, T. H. *et al.* Mitochondrial transfer by photothermal nanoblade restores metabolite profile in  
339 mammalian cells. *Cell Metab.* **23**, 921-929 (2016).
- 340 32 Plotnikov, E. Y., Khryapenkova, T. G., Galkina, S. I., Sukhikh, G. T. & Zorov, D. B. Cytoplasm and  
341 organelle transfer between mesenchymal multipotent stromal cells and renal tubular cells in co-  
342 culture. *Exp. Cell Res.* **316**, 2447-2455 (2010).
- 343 33 Torralba, D., Baixauli, F. & Sanchez-Madrid, F. Mitochondria know no boundaries: Mechanisms and  
344 functions of intercellular mitochondrial transfer. *Front. Cell Dev. Biol.* **4**, 107 (2016).
- 345 34 Sagan, L. On the origin of mitosing cells. *J. Theor. Biol.* **14**, 255-274 (1967).
- 346 35 McCully, J. D., Cowan, D. B., Emani, S. M. & del Nido, P. J. Mitochondrial transplantation: From  
347 animal models to clinical use in humans. *Mitochondrion* **34**, 127-134 (2017).



- 348 36 Emani, S. M., Piekarski, B. L., Harrild, D., del Nido, P. J. & McCully, J. D. Autologous mitochondrial  
349 transplantation for dysfunction after ischemia-reperfusion injury. *J. Thorac. Cardiovasc. Surg.*  
350 10.1016/j.jtcvs.2017.02.018 (2017).
- 351 37 Kumar, S. R. Mitochondrial transplantation: Another miracle of molecular medicine? *J. Thorac.*  
352 *Cardiovasc. Surg.* **154**, 284-285 (2017).
- 353 38 Robicsek, O. *et al.* Isolated mitochondria transfer improves neuronal differentiation of  
354 schizophrenia-derived induced pluripotent stem cells and rescues deficits in a rat model of the  
355 disorder. *Schizophr. Bull.* 10.1093/schbul/sbx077 (2017).
- 356 39 Singh, B., Modica-Napolitano, J. S. & Singh, K. K. Defining the momiome: Promiscuous information  
357 transfer by mobile mitochondria and the mitochondrial genome. *Semin. Cancer Biol.*  
358 10.1016/j.semcancer.2017.05.004 (2017).
- 359 40 Chang, J. C. *et al.* Treatment of human cells derived from MERRF syndrome by peptide-mediated  
360 mitochondrial delivery. *Cytotherapy* **15**, 1580-1596 (2013).
- 361 41 Cowan, D. B., Poutias, D. N., del Nido, P. J. & McGowan, F. X. CD14-independent activation of  
362 cardiomyocyte signal transduction by bacterial endotoxin. *Am. J. Physiol. Heart Circ. Physiol.* **279**,  
363 H619-629 (2000).
- 364 42 McCullagh, P. & Nelder, J. A. **Generalized linear models**. 2nd edn, 285-322 (Chapman and Hall,  
365 1989).

366 **Acknowledgements**

367 Supported by the Boston Children's Hospital Anesthesia Foundation, Ryan Family Endowment, Cardiac  
368 Conduction Fund, Richard and Susan Smith Foundation, President's Innovation Award, Boston  
369 Children's Hospital, Michael B. Klein and Family, Sidman Family Foundation, Kenneth C. Griffin  
370 Charitable Research Fund and Boston Investment Council. We also thank the Harvard Center for  
371 Biological Imaging for infrastructure and support and acknowledge NIH award 1S10RR029237-01,  
372 which was used to acquire the Zeiss ELYRA PS.1 microscope.

373 **Author contributions**

374 D.B.C., P.J.D. and J.D.M. conceived of or designed the experiments. D.B.C., R.Y., and J.K.T.  
375 performed the experiments. D.B.C. R.Y., J.K.T. and D.Z. analysed the data. D.B.C. and J.D.M. wrote  
376 the manuscript. Correspondence and requests for materials should be addressed to D.B.C.  
377 ([douglas.cowan@childrens.harvard.edu](mailto:douglas.cowan@childrens.harvard.edu)).

378 **Competing financial interests**

379 The authors declare no competing financial interests.

380 **FIGURE LEGENDS**

381 **Figure 1 | Experimental strategy and characterisation of isolated human fibroblast mitochondria.**

382 **a**, HCFs infected with BacMam CellLight Mitochondria-GFP were used for mitochondrial isolations and  
383 iPS-CMs or HCFs on coverslips were infected with RFP CellLight reagents to label specific cell  
384 structures. Isolated GFP-labelled mitochondria were added to RFP-labelled cells for 0 to 4 h. **b**, 3-D  
385 SR-SIM of isolated HCF mitochondria stained with MitoTracker Red CMXRos (top panels) or the  
386 human mitochondria-specific antibody MTC02 (bottom panels). Isolated mitochondria, stained  
387 mitochondria, and the combined image are shown left to right. Scale bars, 0.5  $\mu\text{m}$ . **c**, ATP content in  
388 media or isolated HCF mitochondria in the presence or absence of 1  $\mu\text{M}$  ADP. Error bars indicate  
389 standard error of the mean. ATP levels were significantly higher in mitochondria than in media-only  
390 control groups (Student's t-test, \*\*  $p < 0.001$ ). **d**, transmission electron microscopy of isolated HCF  
391 mitochondria. Scale bar, 0.5  $\mu\text{m}$ . The image is representative of four separate mitochondrial isolations.

392 **Figure 2 | Uptake and endocytic transport of extracellular mitochondria in cardiomyocytes. a,**

393 iPS-CMs were exposed to gold-labelled HCF mitochondria for 2.5, 5, and 10 min and imaged by TEM.  
394 Labelled mitochondria had electron dense deposits and were apparent at all three study times outside  
395 cells, adjacent to the apical cell surface, undergoing endocytosis, and inside cells (left to right and  
396 indicated by arrows). Images are representative of four experiments at 5 min. Scale bars, 0.5  $\mu\text{m}$ . **b**,  
397 Four color 3-D SR-SIM of colocalisation of exogenous mitochondria (green) with early endosomes (red)  
398 at 4 h. Nuclei were stained with DAPI (blue) and both endogenous and exogenous mitochondria were  
399 detected with the MTC02 antibody (white). The combined image (left) and each color (right) are shown.  
400 Scale bars, 10  $\mu\text{m}$ . **c**, Colocalisation of HCF mitochondria (green) with late endosomes (red) at 1 h.  
401 Scale bars, 10  $\mu\text{m}$ . **d**, Colocalisation of mitochondria (green) with lysosomes (red) at 4 h. Scale bars,  
402 10  $\mu\text{m}$ . In **c-d**, white arrows indicate examples of exogenous mitochondria associated with each  
403 compartment stained with the anti-mitochondria antibody and yellow arrows show internalised, GFP-  
404 labelled mitochondria encapsulated within late endosomes that were not stained with MTC02. Nuclei

405 were stained with DAPI (blue). Images represent twelve separate volumes analysed at each time (0.5,  
406 1, 2, and 4 h).

407 **Figure 3 | Encapsulation and escape of internalised mitochondria from cell compartments. a,**  
408 Late endosomes (red) associated with GFP-labelled exogenous mitochondria (green) were imaged by  
409 3-D SR-SIM. Examples of encapsulated and escaping mitochondria are shown after 1 h of incubation of  
410 isolated mitochondria and iPS-CMs. Images are representative of four experiments. Scale bars, 0.5  
411  $\mu\text{m}$ . **b,** quantitation of mitochondrial colocalisation with early endosomes, late endosomes, and  
412 lysosomes at 0.5, 1, 2, and 4 h. Results are expressed as the percentage of mitochondria associated  
413 with each compartment (*i.e.* encapsulated and escaping). **c,** quantitation of mitochondria escaping early  
414 endosomes, late endosomes, and lysosomes at 0.5, 1, 2, and 4 h. Results are expressed as the  
415 percentage of mitochondria associated with each compartment, but not fully encapsulated and  
416 represent a minimum of twelve experiments. **d,** quantitation of the colocalisation of endocytosed  
417 mitochondria with endogenous cardiomyocyte mitochondria. Results are expressed as the percentage  
418 of GFP-labelled mitochondria associated with RFP-labelled mitochondria. **e,** ATP content of culture  
419 media and cardiomyocytes treated with isolated HCF mitochondria for 0, 0.25, 0.5, 1, 2, and 4 h. ATP  
420 content is expressed as  $\mu\text{M}$  per 1000 cells and error bars indicate standard error of the mean. ATP was  
421 significantly higher in iPS-CMs treated with mitochondria for 0.5, 1, 2, and 4 h compared to untreated  
422 cells (Student's t-test, \*  $p < 0.02$ ). Results were obtained from twelve separate experiments.

423 **Figure 4 | Fusion of exogenous mitochondria with the cardiomyocyte mitochondrial network. a,**  
424 iPS-CMs with RFP-labelled mitochondria (red) treated for 4 h with isolated GFP-labelled mitochondria  
425 (green). After fixation, the nuclei were stained with DAPI (blue) and slides were imaged using 3-D SR-  
426 SIM. Individual red, green, and blue channels are shown along with the combined color rendering.  
427 Fusion of endocytosed mitochondria with the endogenous mitochondrial network is readily apparent.  
428 Mitochondrial fusion was apparent at all times examined (0.5, 1, 2, and 4 h) and four separate

429 experiments were performed. Scale bars, 0.5  $\mu\text{m}$ . **b**, immunoblot analysis of cell lysates (25  $\mu\text{g}$  per  
430 lane) from iPS-CMs and HCFs using antibodies directed against MFN1, MFN2, OPA1, and  
431 mitochondria (113-1). Lanes loaded with molecular weight standards (MW) are denoted and arrows  
432 indicate the specifically detected protein(s) for each antibody. Immunoblot experiments were repeated  
433 six times. **c**, 3-D SR-SIM of human cardiomyocytes containing RFP-labelled mitochondria (red)  
434 incubated with isolated GFP-labelled exogenous mitochondria (green) for 30 min. Coverslips were fixed  
435 and stained with a mitofusin-1 (MFN1) antibody (white). The top panels show the three separate color  
436 channels and the combined image (left to right). The boxed regions have been magnified in successive  
437 images (top right to lower panels, left to right) to demonstrate the reactivity of the MFN1 antibody with  
438 fusing mitochondria and the presence of this antibody throughout the cytosol. Parallel experiments  
439 were performed at 1, 2, and 4 h and the presented images are representative of four separate  
440 experiments. Scale bars, 0.5  $\mu\text{m}$ .

441 **Extended Data Figure 1 | Widefield fluorescence microscopy of human cardiomyocytes and**  
442 **cardiac fibroblasts. a**, iPS-CMs (left) and HCFs (right) stained with ACTN or vimentin antibodies (red),  
443 respectively. Mitochondria in these cells (green) were stained with MTC02 (left) or TOMM20 (right) and  
444 the nuclei were stained with DAPI (blue). Scale bars, 50  $\mu\text{m}$ . **b**, Cardiomyocytes (top panels) and  
445 fibroblasts (bottom panels) infected with CellLight BacMam 2.0 reagents. Baculovirus infection rates  
446 after 16 h were similar for each cell type (84.45%  $\pm$  1.45 for iPS-CMs and 84.43%  $\pm$  1.80 for HCFs,  
447 mean percentage of cells expressing fluorescent proteins  $\pm$  SEM). Expression of RFP was apparent in  
448 the appropriate cellular organelles. Images represent six separate infections with each baculovirus  
449 reagent. Scale bars, 10  $\mu\text{m}$ .

450 **Extended Data Figure 2 | Internalised exogenous mitochondrial position within cardiomyocytes.**  
451 **a**, An exogenous mitochondria (green) associated with the endogenous mitochondrial network (red)  
452 after 1 h in iPS-CMs that were subsequently stained for the contractile apparatus with ACTN (white)

453 and DNA with DAPI (blue). The combined image (left) and individual colors (right) are shown. Images  
454 are representative of four separate experiments. Scale bar, 10  $\mu\text{m}$ . **b**, Early endosomes (red),  
455 internalised mitochondria (green), and EEA1 staining (white) of iPS-CMs at 30 min. These images  
456 show exogenous mitochondria encapsulated within early endosomes, escaping from these vesicles, or  
457 not associated with this compartment. Images are representative of four separate experiments. Scale  
458 bars, 0.5  $\mu\text{m}$ . **c**, Late endosomes (red), internalised mitochondria (green), and Rab7 staining (white) of  
459 iPS-CMs at 2 h. These panels show exogenous mitochondria encapsulated and escaping from late  
460 endosomes. Images are representative of four separate experiments. Scale bars, 0.5  $\mu\text{m}$ . **d**,  
461 Lysosomes (red), internalised mitochondria (green), and Rab7 staining (white) of iPS-CMs at 2 h. The  
462 encapsulated GFP-labelled mitochondria appear to be fragmented, indicative of hydrolytic enzyme  
463 activity. Images are representative of four separate experiments. Scale bars, 0.5  $\mu\text{m}$ .

464 **Extended Data Figure 3 | Exogenous mitochondrial fusion with endogenous mitochondria in**  
465 **human cardiac fibroblasts. a**, RFP-labelled HCF mitochondria were isolated and incubated with  
466 HCFs containing GFP-labelled mitochondria for 2 h. The transparent rendering was depicted with a  
467 black (left panel) and grey background (middle panel) to accentuate the association of exogenous  
468 mitochondria with the endogenous mitochondrial network (arrows). Depth coding analysis using Zen  
469 Black software (Zeiss) showed that RFP and GFP mitochondria occupied the same spatial position in  
470 the 1.6  $\mu\text{m}$  thick cell. The color scale indicates distance ( $\mu\text{m}$ ) from the bottom to the top of the cell.  
471 Images are representative of four separate experiments. Scale bars, 10  $\mu\text{m}$ . **b**, a 3-D volumetric  
472 rendering (left) and rotation (right) of a fibroblast containing RFP-labelled mitochondria that had been  
473 exposed to isolated GFP-labelled HCF extracellular mitochondria for 4 h. Fusion of exogenous and  
474 endogenous mitochondria was apparent (arrows). Images are representative of four separate  
475 experiments and similar results were obtained at 0.5, 1, and 2 h. Scale bars, 10  $\mu\text{m}$ . **c**, fusion of an  
476 exogenous GFP-labelled mitochondria with the HCF mitochondrial network (red) at 1 h. 3-D volumetric

477 renderings are depicted with a grey background to emphasize the colors. The boxed region in the left  
478 image is magnified on the right. Scale bars, 0.5  $\mu\text{m}$ .

479 **Extended Data Figure 4 | Depth-coding analysis of fusion in iPS-CMs and involvement of**  
480 **mitofusin-2. a**, Depth coding analysis of the images presented in Fig 4a using Zen Black software  
481 (Zeiss). The color scale extends for 2.5  $\mu\text{m}$  and the fusing mitochondria occupied identical spatial  
482 positions. **b**, 3-D SR-SIM of human cardiomyocytes containing RFP-labelled mitochondria (red)  
483 incubated with isolated GFP-labelled exogenous mitochondria (green) for 2 h. Coverslips were fixed  
484 and stained with a mitofusin-2 (MFN2) antibody (white). The top and bottom panels show separate  
485 color channels and the combined image at two different magnifications. Although the antibody reacted  
486 with fusing mitochondria, there was also considerable staining of the nucleus and cytosol that was not  
487 associated with mitochondria. Images are representative of four separate experiments. Scale bars, 10  
488  $\mu\text{m}$  (top) and 0.5  $\mu\text{m}$  (bottom).

489 **Extended Data Figure 5 | Schematic representation of the fate of endocytosed mitochondria.**  
490 Extracellular mitochondria are internalised in human cardiomyocytes and cardiac fibroblasts through  
491 actin-dependent endocytosis. These exogenous mitochondria escape from endosomal and lysosomal  
492 compartments and fuse with the endogenous mitochondrial network or are degraded through hydrolysis  
493 and phagocytosis.

Figure 1

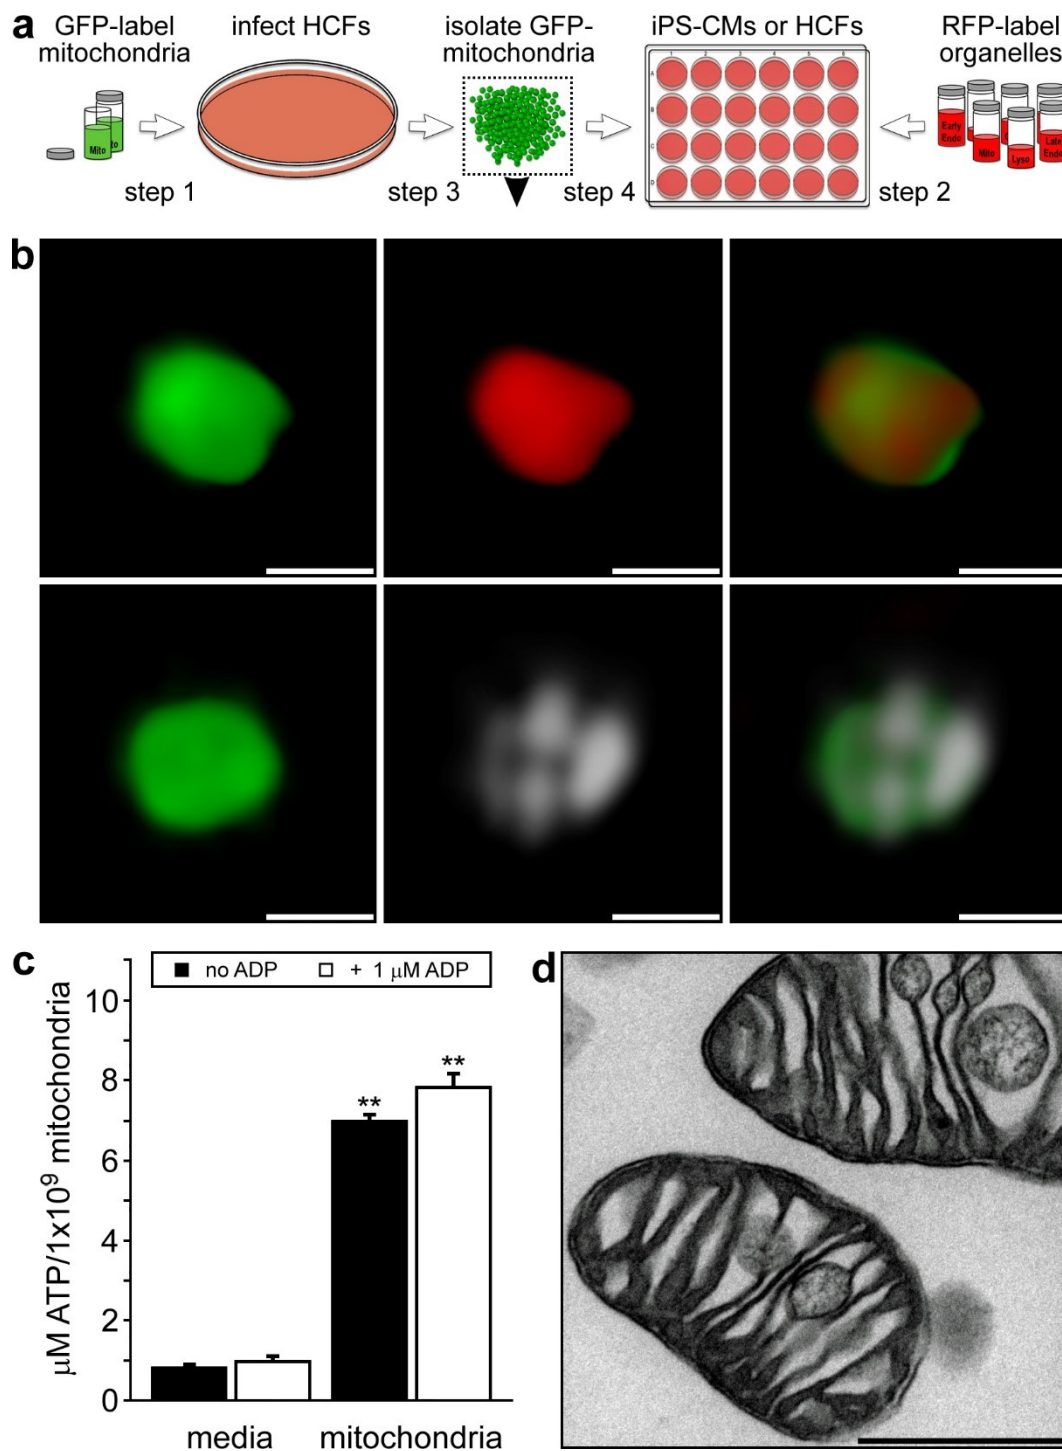



Figure 2

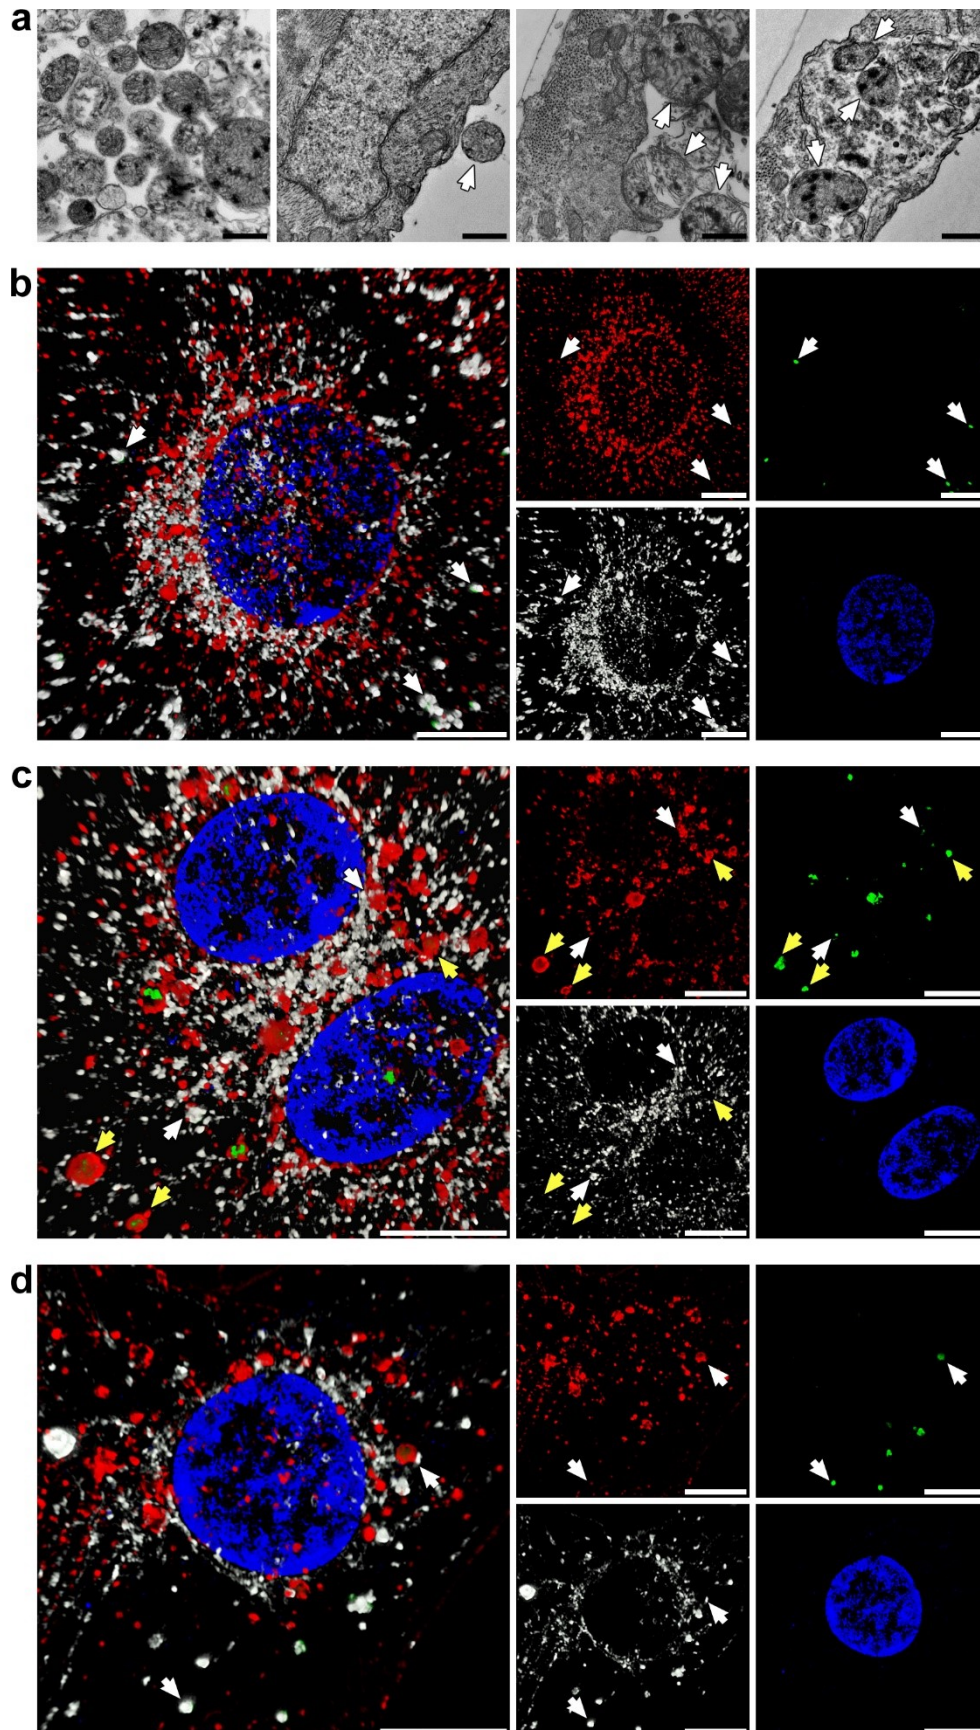

Figure 3

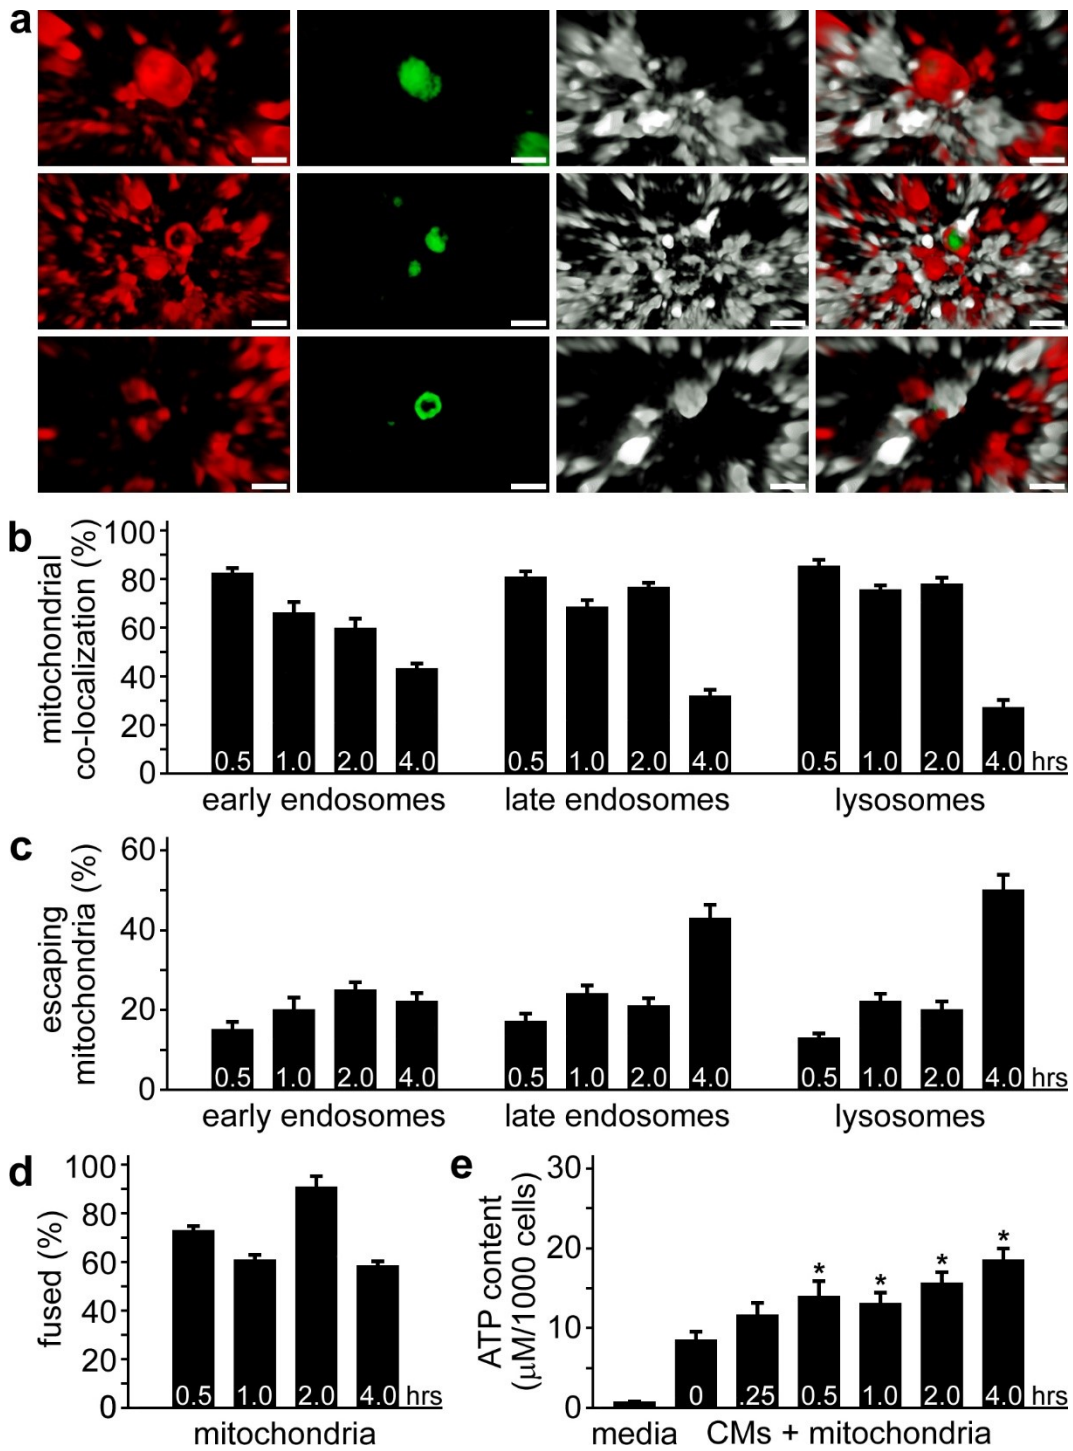



Figure 4

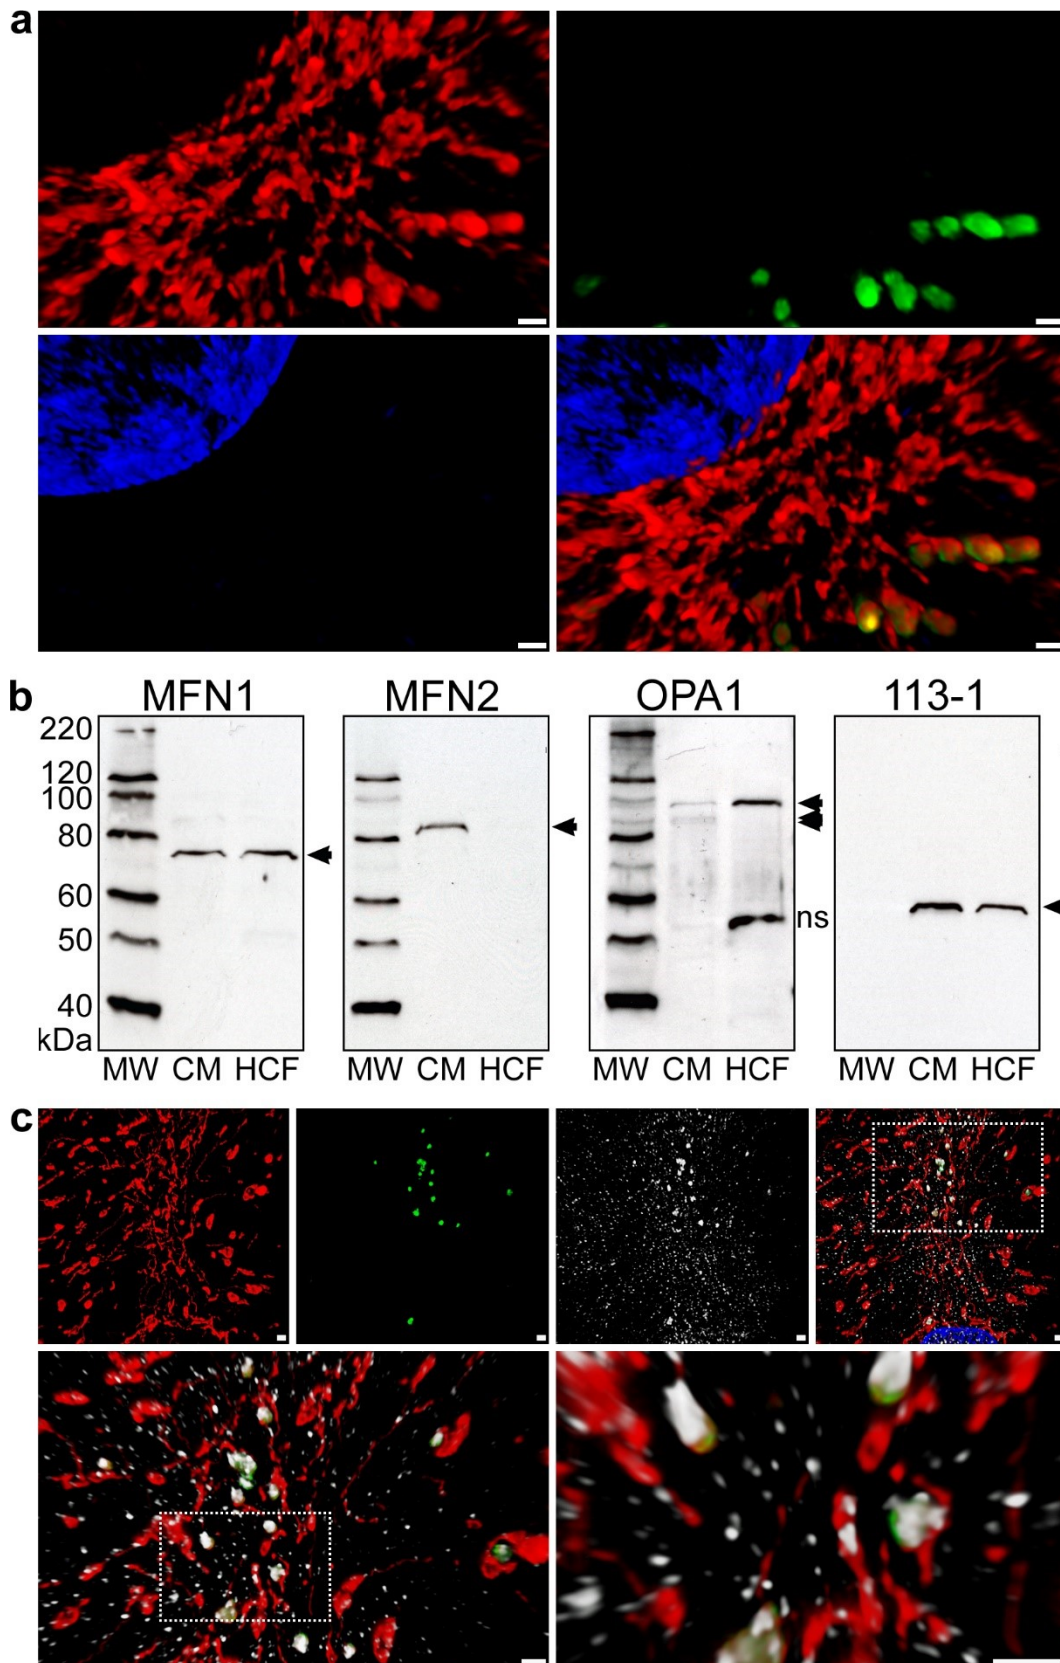

## Extended Data Figure 1

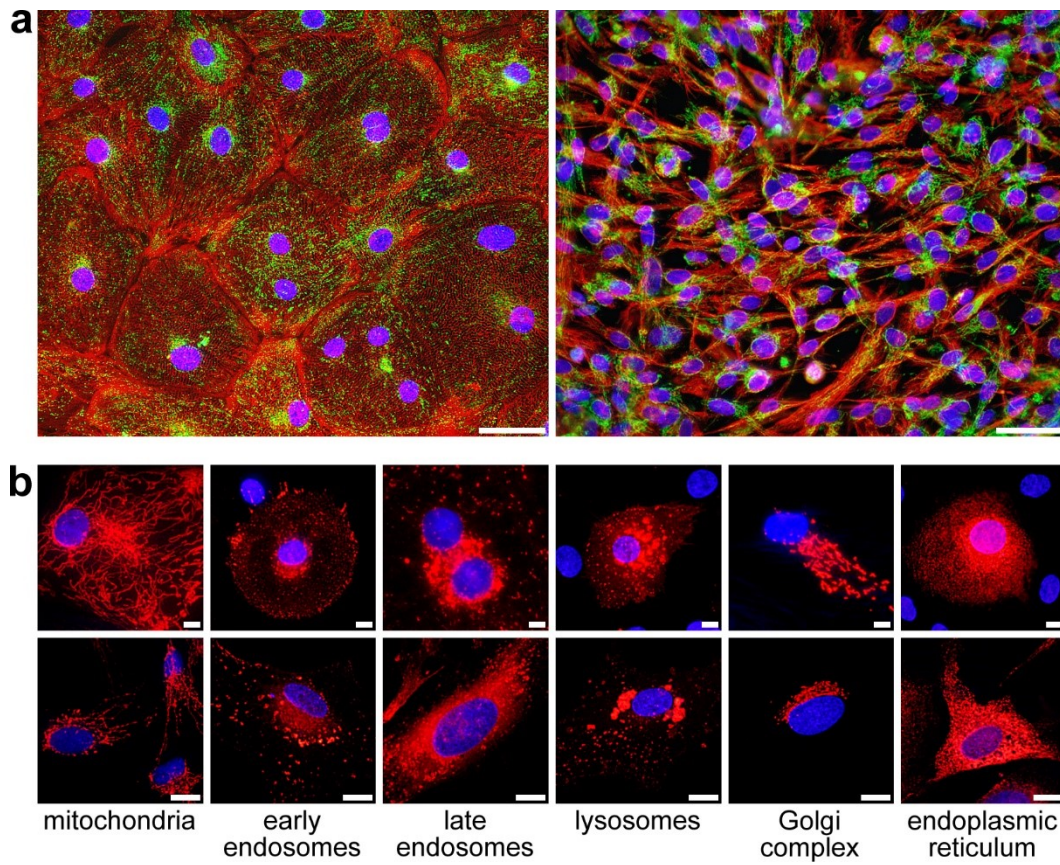



## Extended Data Figure 2

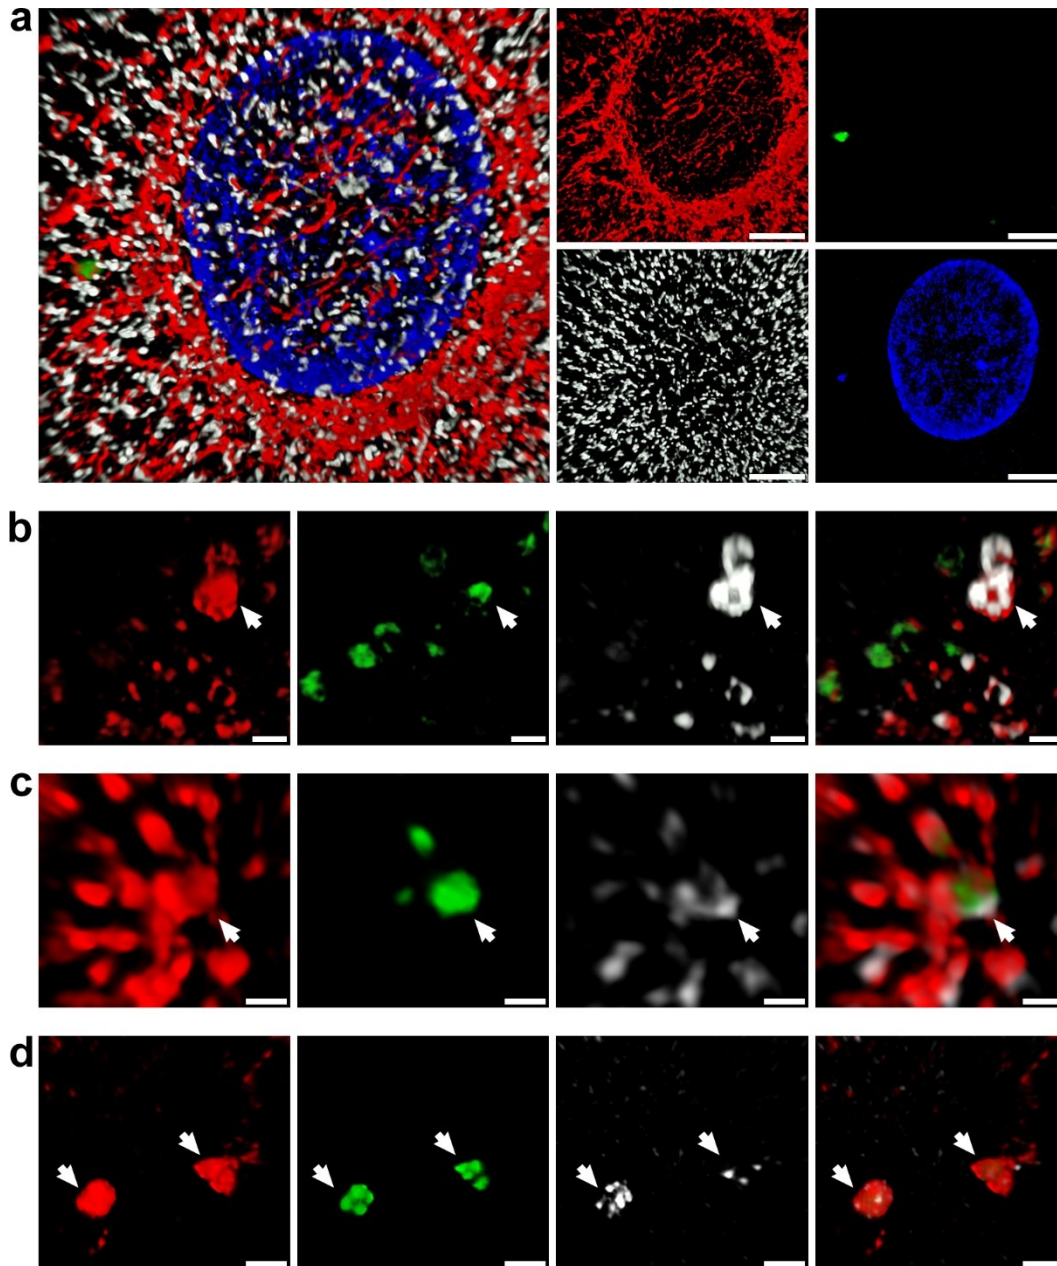

### Extended Data Figure 3

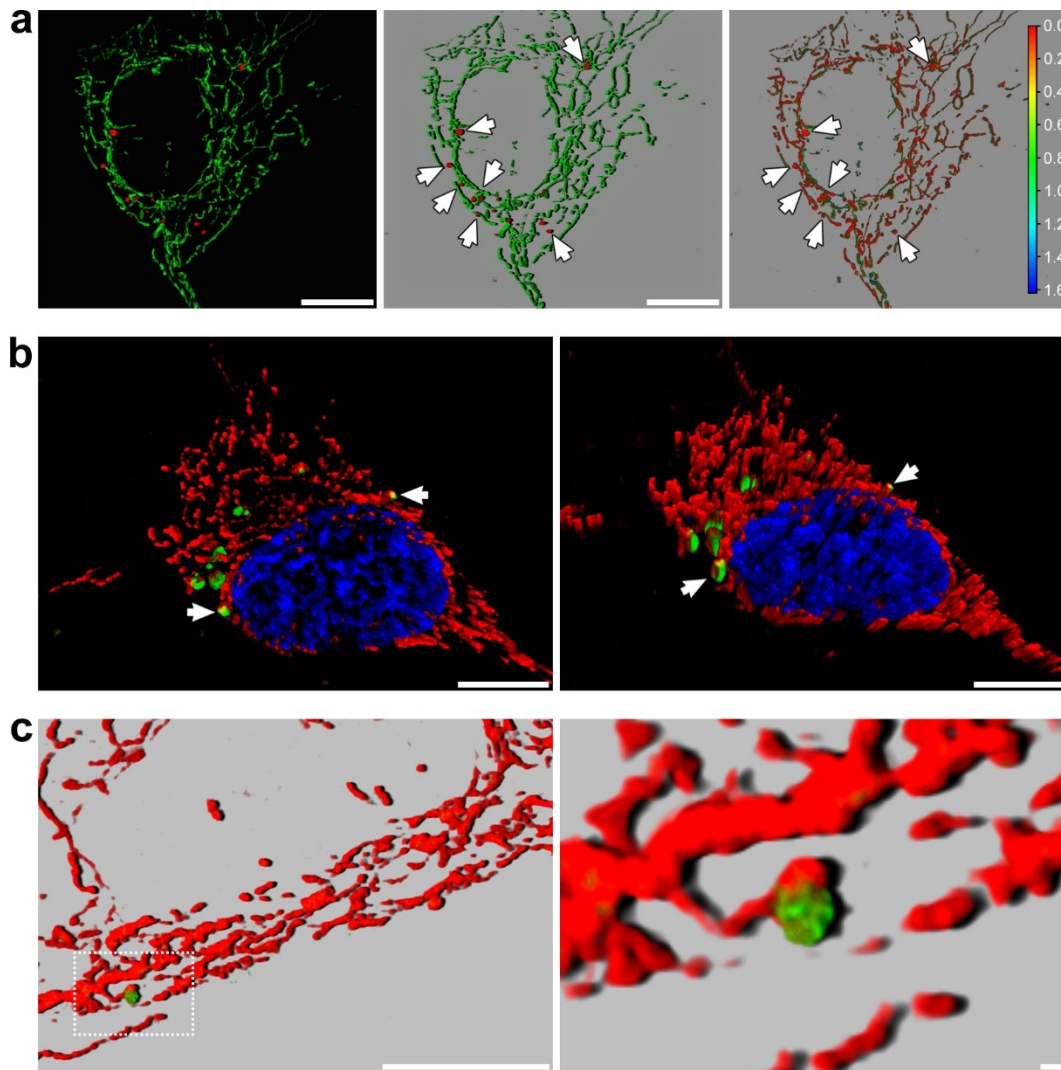

## Extended Data Figure 4

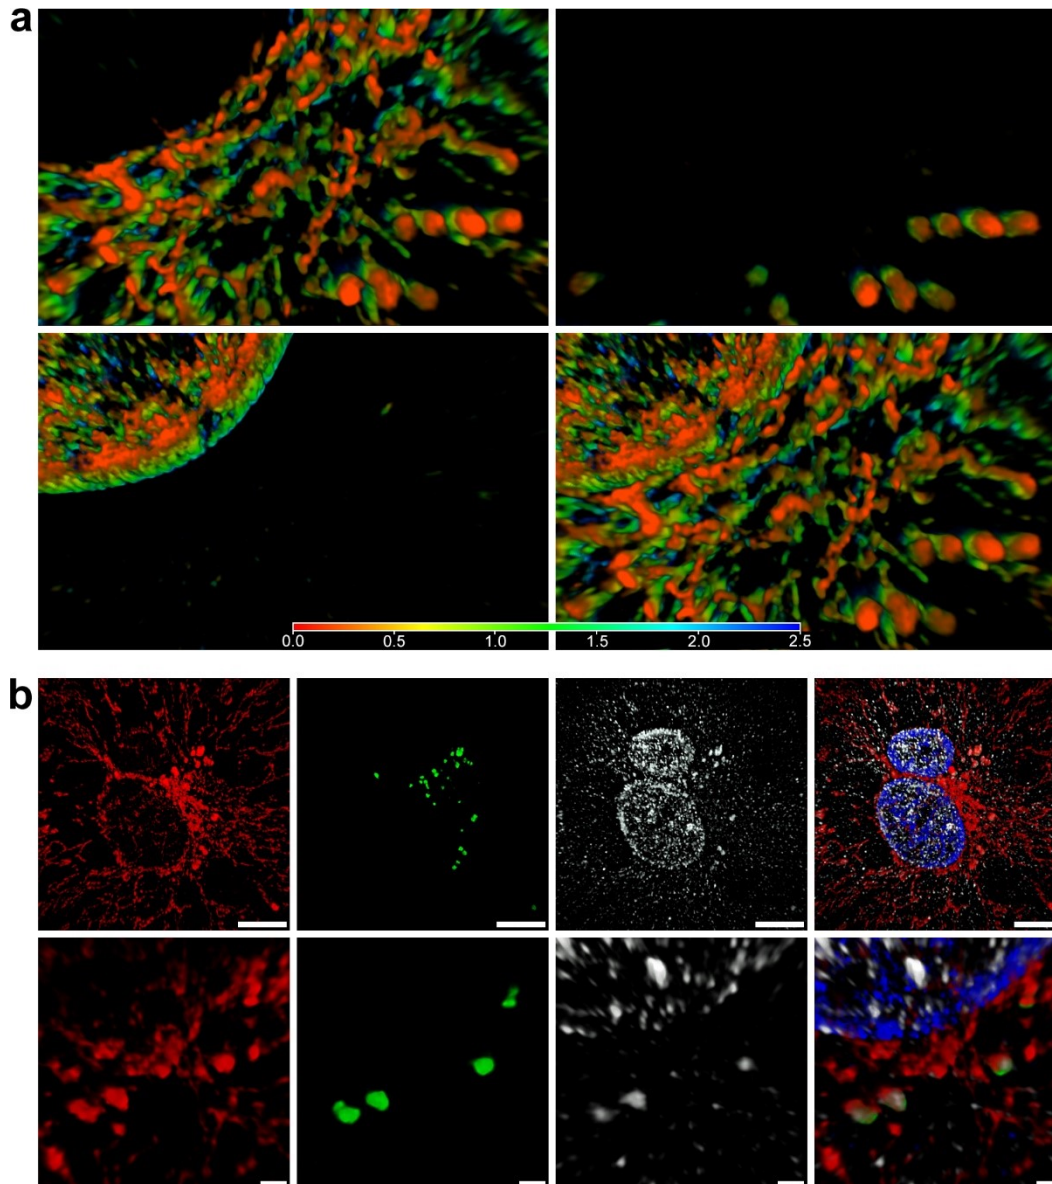

## Extended Data Figure 5

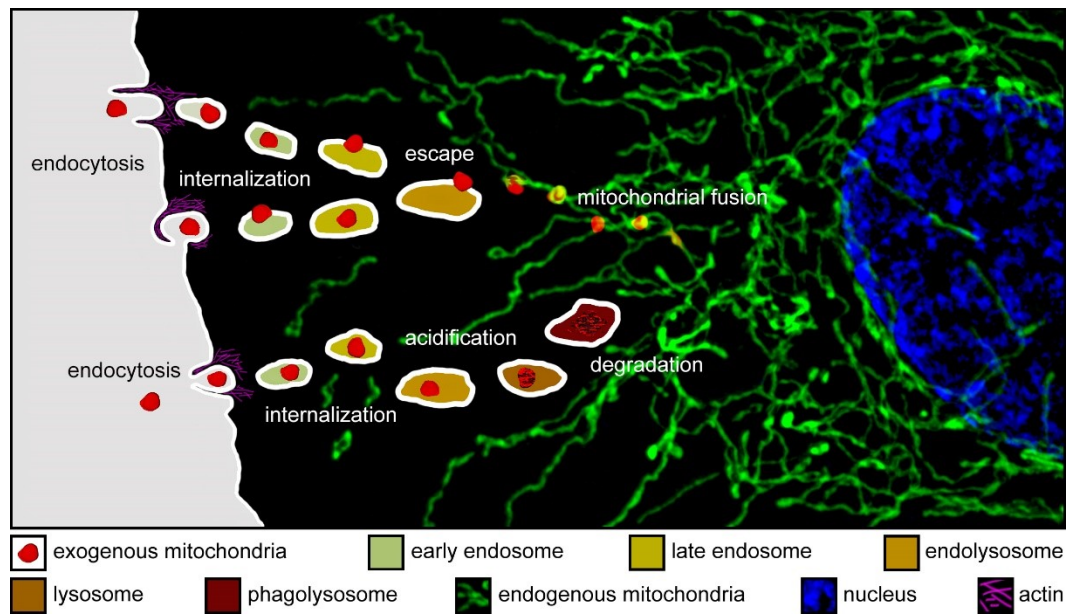

Source: https://www.biorxiv.org/content/10.1101/157164v1.full.pdf
